# Supplementary material for: The Climate Change Impact of Finnish Fish Products
Source: Research Square preprint supplement (doi:10.21203/rs.3.rs-6152746/v1), 2025-03-31
Supplement: Supplementary file 1 [file eb7acb44fae950ed9c73a16d.docx]

The Climate Change Impact of Finnish Fish Products

Frans Silvenius, Kirsi Silvennoinen, Jari Setälä, Tapio Keskinen, Markus Kankaine), Kaija Saarni), Jari Niukko, Ilkka Leinonen

Supplementary material

Table 10. LCA-results divided into product phases, kgCO2-eq/kgFU

|  | Feed raw materials | Feed production | Hatchery | Fish farming | Fishing | Processing | Raw material transports | Packaging | Distribution | Total |
| --- | --- | --- | --- | --- | --- | --- | --- | --- | --- | --- |
| Rainbow trout fillet | 2.22 | 0.04 | 0.08 | 0.36 |  | 0.22 | 0.6 | 0.5 | 0.02 | 3.69 |
| Baltic Herring fillet, fish trap |  |  |  |  | 0.11 | 0.43 | 0.08 | 0.10 | 0.03 | 0.74 |
| Baltic Herring fillet, fish trawl |  |  |  |  | 1.02 | 0.36 | 0.09 | 0.07 | 0.03 | 1.57 |
| Perch fillet, net |  |  |  |  | 1.80 | 0.16 | 0.21 | 0.32 | 0.02 | 2.35 |
| Pikeperch fillet. net |  |  |  |  | 1.10 | 0.11 | 0.48 | 0.31 | 0.07 | 2.07 |
| Gutted vendace, seine |  |  |  |  | 0.30 | 0.61 | 0.20 | 0.13 | 0.04 | 1.29 |
| Gutted vendace, trawl |  |  |  |  | 1.46 | 0.61 | 0,16 | 0,14 | 0.04 | 2.41 |

The background data can be got from authors if necessary.
